# Supplementary material for: Synthesis of Novel Benzazole Derivatives and Evaluation of Their Antidepressant-Like Activities with Possible Underlying Mechanisms
Source: PubMed Central journal article supplement (PMC6278502; doi:10.3390/molecules23112881), 2018-11-05
Supplement: molecules-23-02881-s001.pdf [file molecules-23-02881-s001.pdf]

## DOPNALAB

| Item               | Value                                                     |
|--------------------|-----------------------------------------------------------|
| Acquired Date&Time | 13.04.2018 15:38:48                                       |
| Acquired by        | System Administrator                                      |
| Filename           | C:\Users\dopnalab\Desktop\denyal\GAMZE TOKGÖZ\BI-ME1.lspd |
| Spectrum name      | BI-ME1                                                    |
| Sample name        | BI-ME                                                     |
| Sample ID          |                                                           |
| Option             |                                                           |
| Comment            |                                                           |
| No. of Scans       | 10                                                        |
| Resolution         | 4 [cm-1]                                                  |
| Apodization        | Happ-Genzel                                               |

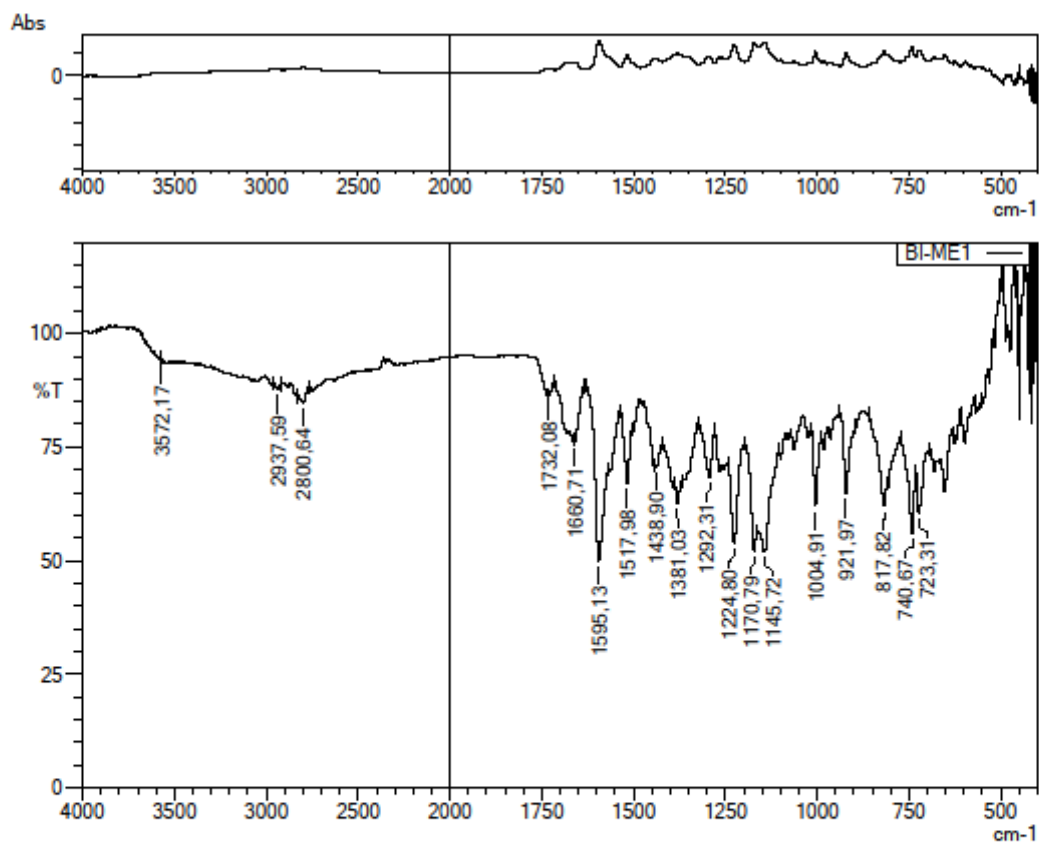

**Spectra 1.** IR spectra of compound **4a**

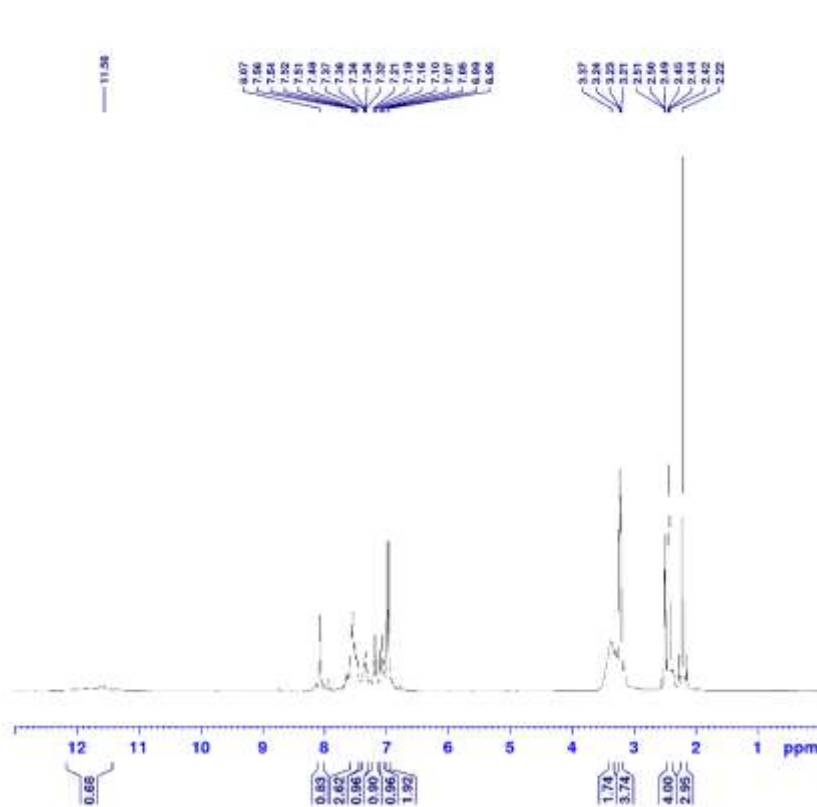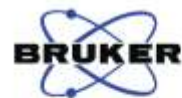

Current Data Parameters  
 NAME GT-9  
 EXPNO 1  
 PROCNO 1

F2 - Acquisition Parameters  
 Date\_ 20180511  
 Time 16.51  
 INSTRUM FOURIER300  
 PROBRD 5 mm DUL 13C-1  
 PULPROG zgpg  
 ID 32768  
 SOLVENT DMSO  
 NS 18  
 DS 4  
 SWH 8103.074 Hz  
 FIDRES 0.172528 Hz  
 AQ 1.242173 sec  
 RG 14.3187  
 CW 81.000 usec  
 CC 0.10 usec  
 IE 81.0 K  
 D1 3.0000000 sec  
 D2 0  
 D3 0

----- CHANNEL f1 -----  
 SFO1 300.136267 MHz  
 PFO1 18  
 F1 13.00 usec  
 PLW1 13.0000000 W

F2 - Processing parameters  
 SI 32768  
 SF 300.136267 MHz  
 KW 18  
 SSB 0  
 LB 0.30 Hz  
 GB 0  
 DC 1.00

Spectra 2. <sup>1</sup>H-NMR spectra of compound 4a

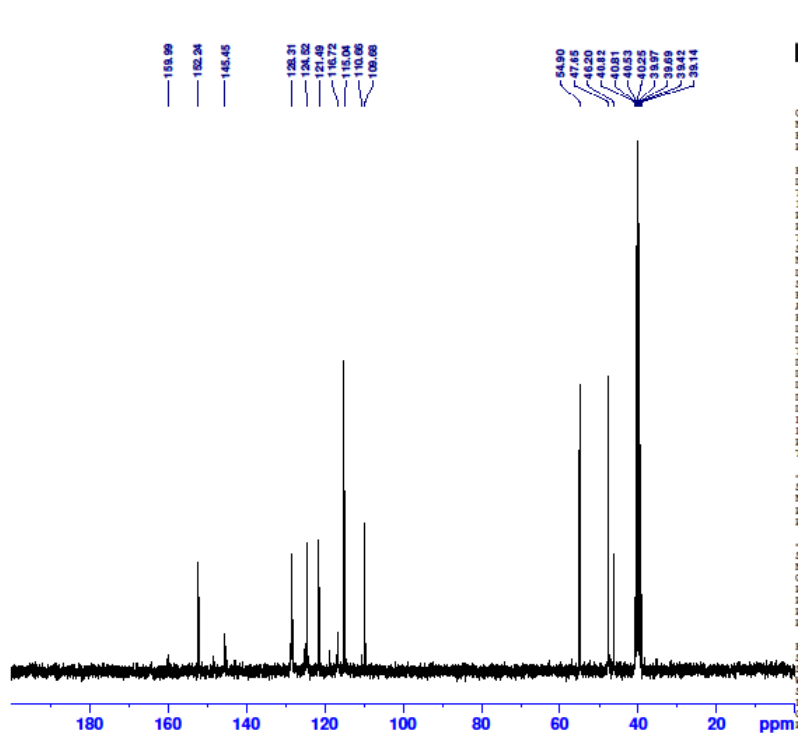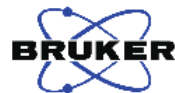

Current Data Parameters  
 NAME GT-9  
 EXPNO 2  
 PROCNO 1

F2 - Acquisition Parameters  
 Date\_ 20180623  
 Time 16.52  
 INSTRUM FOURIER300  
 PROBRD 5 mm DUL 13C-1  
 PULPROG zgpg  
 ID 32768  
 SOLVENT DMSO  
 NS 2048  
 DS 4  
 SWH 24414.063 Hz  
 FIDRES 0.745058 Hz  
 AQ 0.6710886 sec  
 RG 501.187  
 CW 20.480 usec  
 DE 6.50 usec  
 TE 617.7 K  
 D1 1.00000000 sec  
 D11 0.03000000 sec  
 D31 0.00001500 sec  
 D32 0.89999998 sec  
 D40 0.00093990 sec  
 L4 23  
 L5 26  
 F32 90.00 usec  
 TD0 1

----- CHANNEL f1 -----  
 SFO1 75.4878657 MHz  
 NUC1 13C  
 P1 15.00 usec  
 PLW1 15.0000000 W

----- CHANNEL f2 -----  
 SFO2 300.136267 MHz  
 NUC2 18  
 CPDPRG[2] waltz16  
 PCPD2 90.00 usec  
 PIM2 10.0000000 W  
 PIM12 0.20863999 W  
 PIM13 0.10495000 W

F2 - Processing parameters  
 SI 32768  
 SF 75.4803210 MHz  
 KW 18  
 SSB 0  
 LB 1.00 Hz  
 GB 0  
 DC 1.40

### Spectra 3. <sup>13</sup>C-NMR spectra of compound 4a

29.06.2018 16:22:40 Page 1 / 1

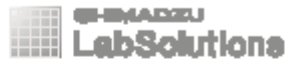

## Analysis Report

#### <Sample Information>

|                  |                       |              |                        |
|------------------|-----------------------|--------------|------------------------|
| Sample Name      | : BI-Me               | Sample Type  | : Unknown              |
| Sample ID        | :                     |              |                        |
| Data Filename    | : BI-Me_004.lcd       |              |                        |
| Method Filename  | : genel.lcm           |              |                        |
| Batch Filename   | : batch.lcb           |              |                        |
| Vial #           | : 1-4                 |              |                        |
| Injection Volume | : 0,1 uL              |              |                        |
| Date Acquired    | : 29.06.2018 16:18:41 | Acquired by  | : System Administrator |
| Date Processed   | : 29.06.2018 16:19:44 | Processed by | : System Administrator |

#### <Chromatogram>

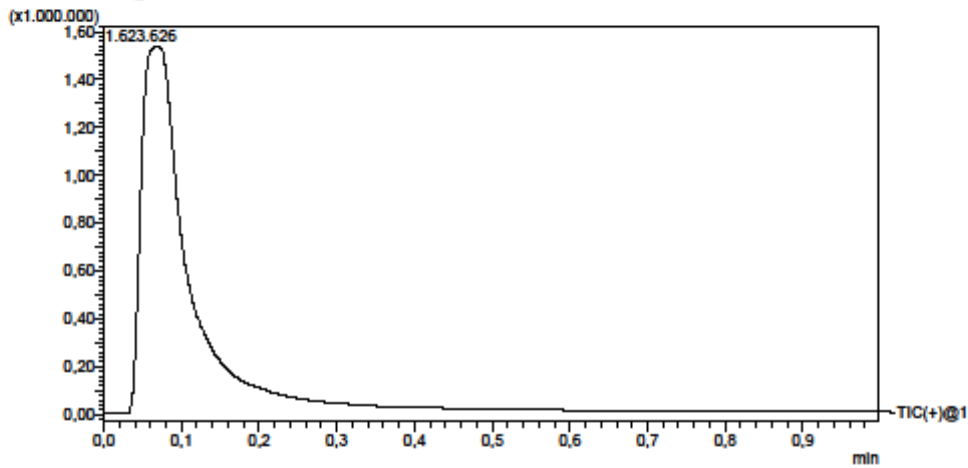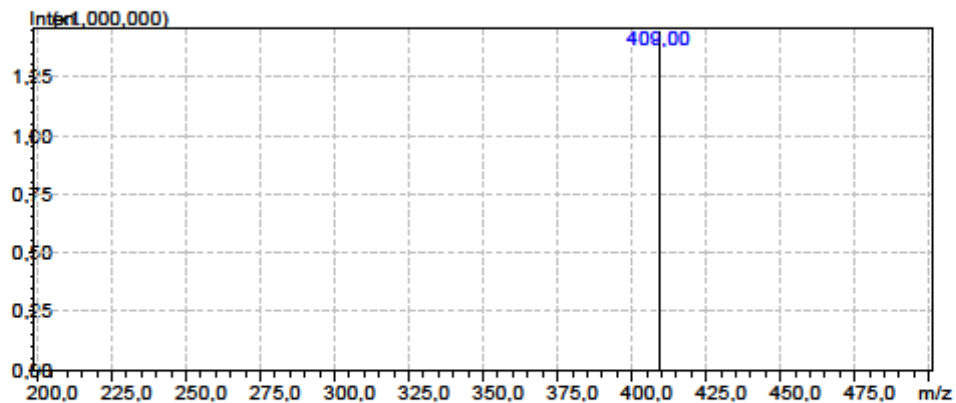

C:\LabSolutions\Data\serkan\Yeni klasör\BI-Me\_004.lcd

### Spectra 4. LCMSMS spectra of compound 4a

## DOPNALAB

| Item               | Value                                                    |
|--------------------|----------------------------------------------------------|
| Acquired Date&Time | 13.04.2018 15:42:19                                      |
| Acquired by        | System Administrator                                     |
| Filename           | C:\Users\dopnalab\Desktop\denya\GAMZE TOKGÖZ\BI-ET1.lspd |
| Spectrum name      | BI-ET1                                                   |
| Sample name        | BI-ET                                                    |
| Sample ID          |                                                          |
| Option             |                                                          |
| Comment            |                                                          |
| No. of Scans       | 10                                                       |
| Resolution         | 4 [cm-1]                                                 |
| Apodization        | Happ-Genzel                                              |

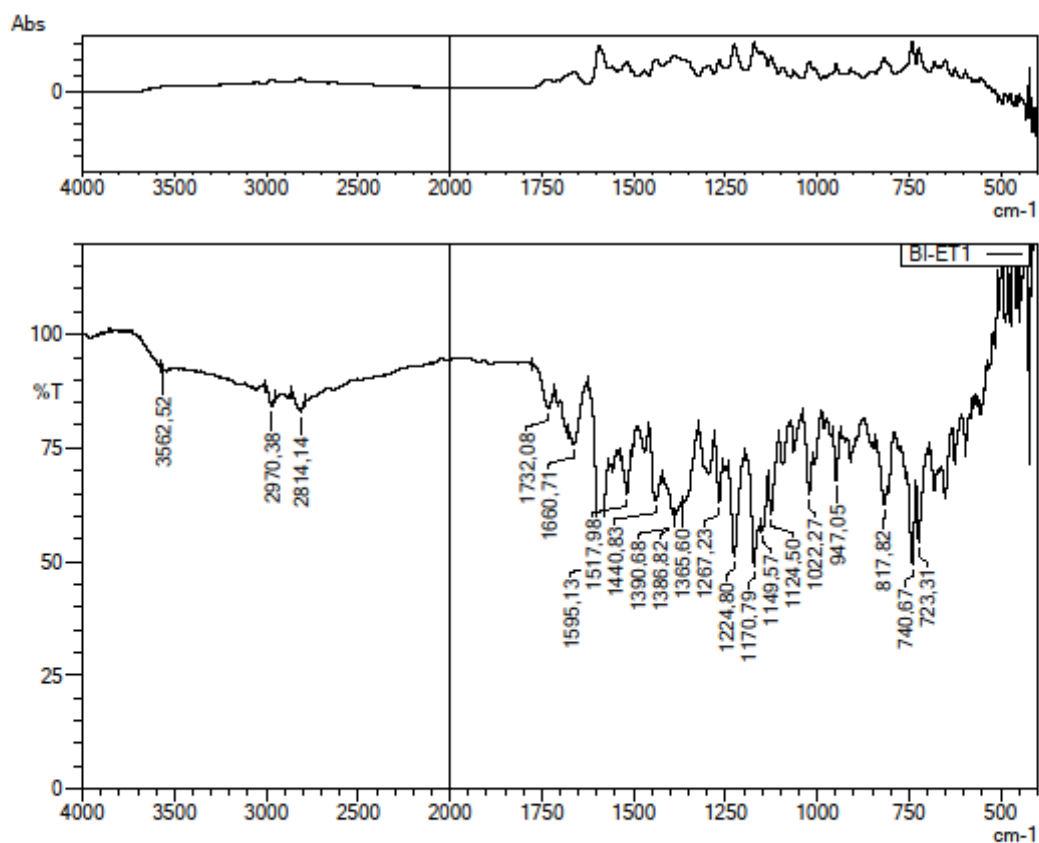

**Spectra 5.** IR spectra of compound **4b**

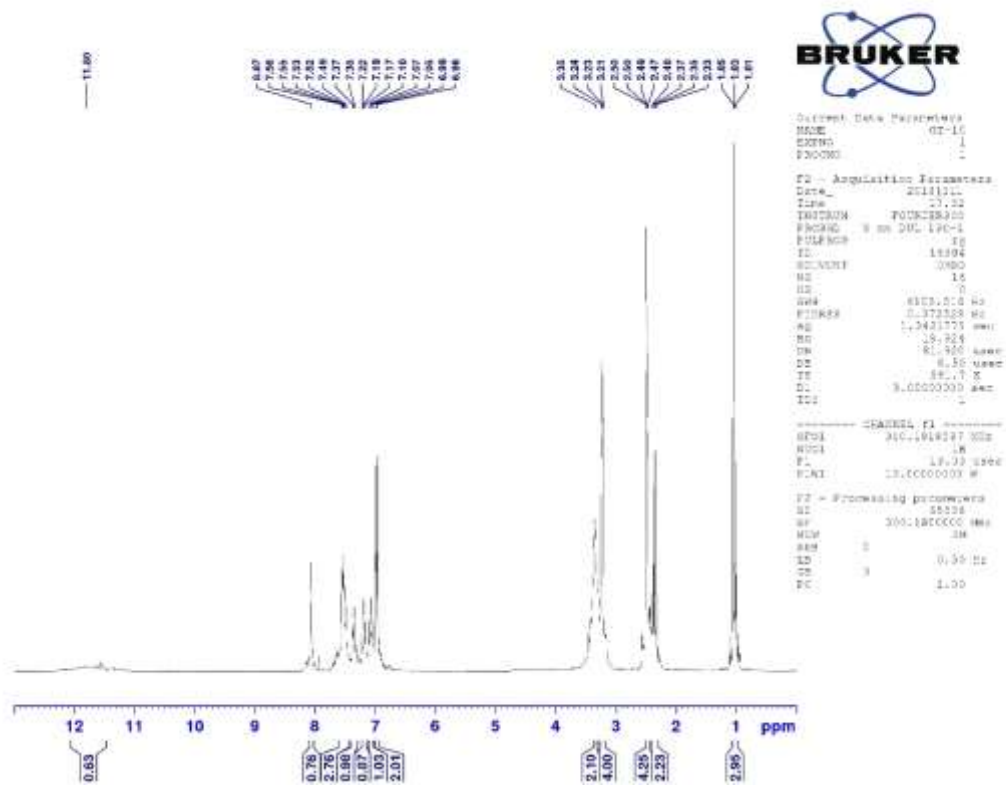

Spectra 6. <sup>1</sup>H-NMR spectra of compound 4b

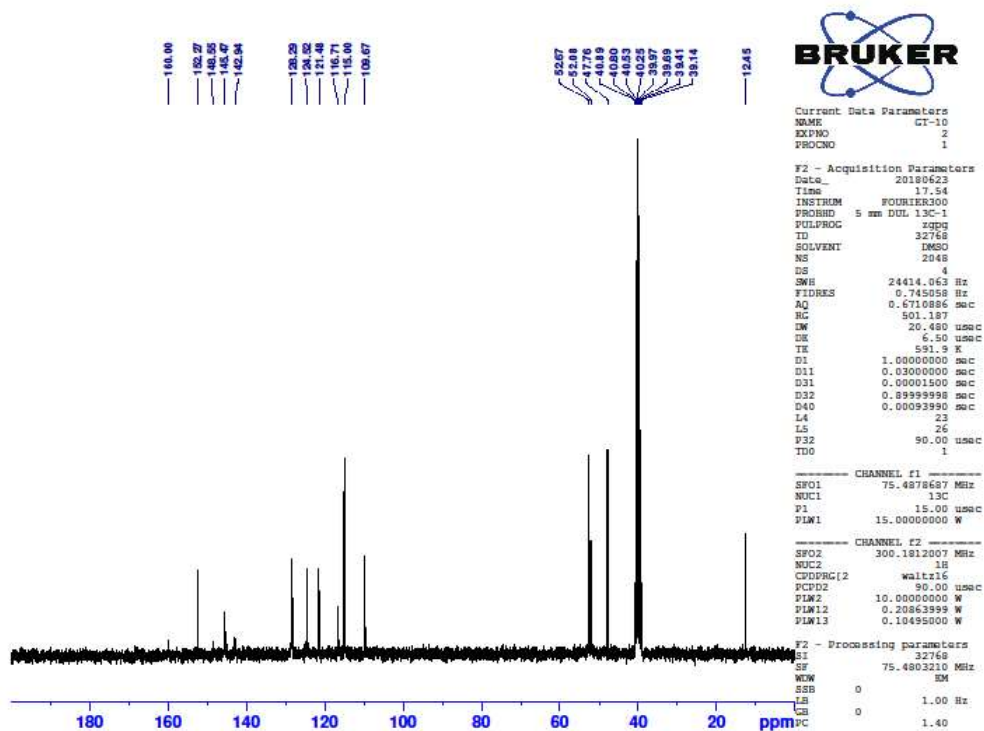

Spectra 7. <sup>13</sup>C-NMR spectra of compound 4b

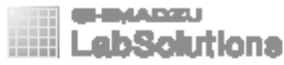

# Analysis Report

## <Sample Information>

|                  |                       |              |                        |
|------------------|-----------------------|--------------|------------------------|
| Sample Name      | : BI-et               | Sample Type  | : Unknown              |
| Sample ID        | :                     |              |                        |
| Data Filename    | : BI-et_001.lcd       |              |                        |
| Method Filename  | : genel.lcm           |              |                        |
| Batch Filename   | : batch.lcb           |              |                        |
| Vial #           | : 1-5                 |              |                        |
| Injection Volume | : 0,1 uL              |              |                        |
| Date Acquired    | : 29.06.2018 16:26:55 | Acquired by  | : System Administrator |
| Date Processed   | : 29.06.2018 16:27:59 | Processed by | : System Administrator |

## <Chromatogram>

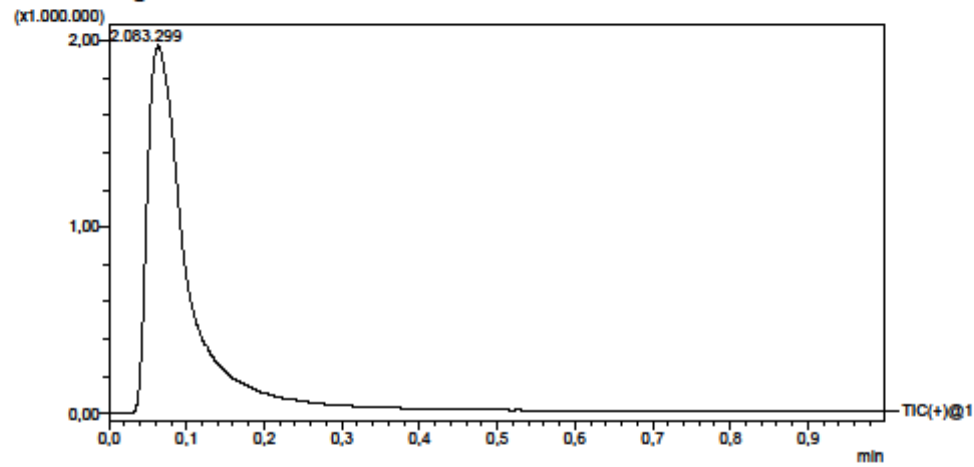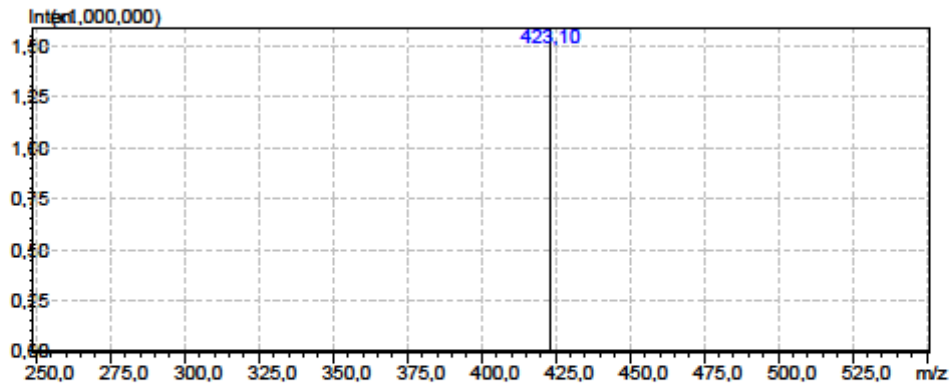

C:\LabSolutions\Data\serkan\Yeni klasör\BI-et\_001.lcd

**Spectra 8.** LCMSMS spectra of compound **4b**

## DOPNALAB

| Item               | Value                                                     |
|--------------------|-----------------------------------------------------------|
| Acquired Date&Time | 13.04.2018 15:49:00                                       |
| Acquired by        | System Administrator                                      |
| Filename           | C:\Users\dopnalab\Desktop\denya\GAMZE TOKGÖZ\BI-ISO1.ispd |
| Spectrum name      | BI-ISO1                                                   |
| Sample name        | BI-ISO                                                    |
| Sample ID          |                                                           |
| Option             |                                                           |
| Comment            |                                                           |
| No. of Scans       | 10                                                        |
| Resolution         | 4 [cm-1]                                                  |
| Apodization        | Happ-Genzel                                               |

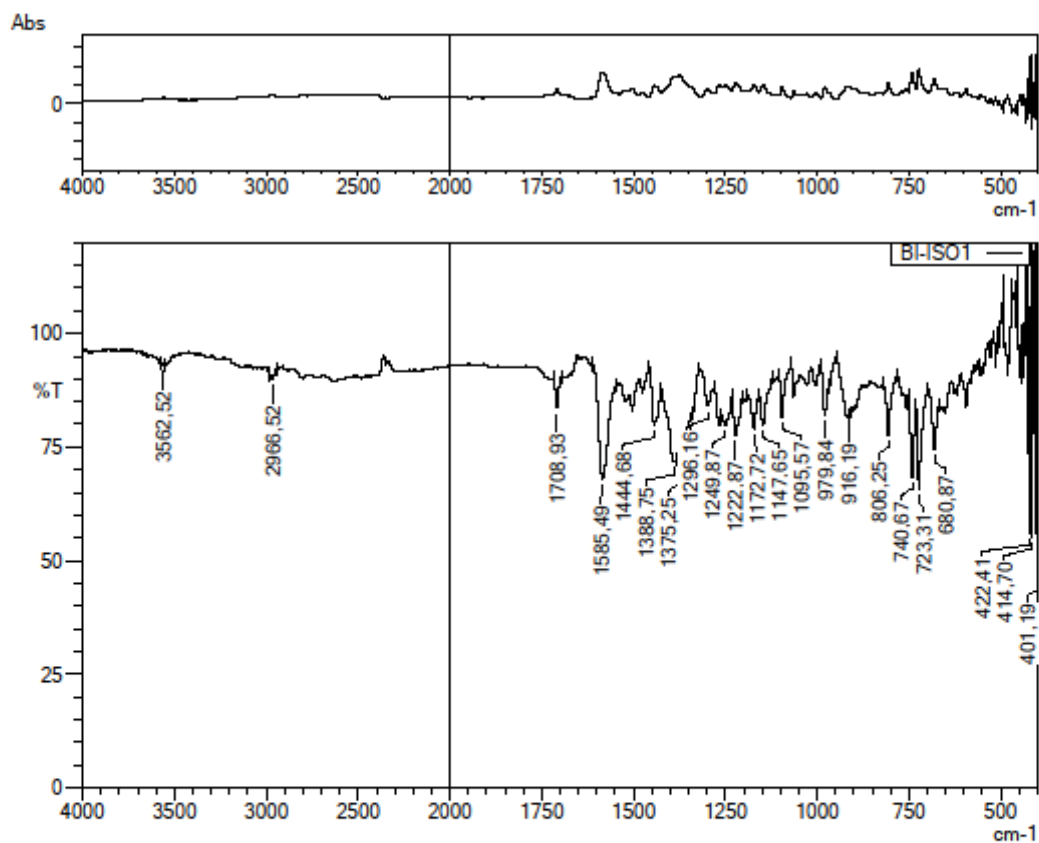

**Spectra 9.** IR spectra of compound **4c**







# Analysis Report

## <Sample Information>

|                  |                       |              |                        |
|------------------|-----------------------|--------------|------------------------|
| Sample Name      | : BI-iso              | Sample Type  | : Unknown              |
| Sample ID        | :                     |              |                        |
| Data Filename    | : BI-iso_001.lcd      |              |                        |
| Method Filename  | : genel.lcm           |              |                        |
| Batch Filename   | : batch.lcb           |              |                        |
| Vial #           | : 1-6                 |              |                        |
| Injection Volume | : 0,1 uL              |              |                        |
| Date Acquired    | : 29.06.2018 16:31:40 | Acquired by  | : System Administrator |
| Date Processed   | : 29.06.2018 16:32:43 | Processed by | : System Administrator |

## <Chromatogram>

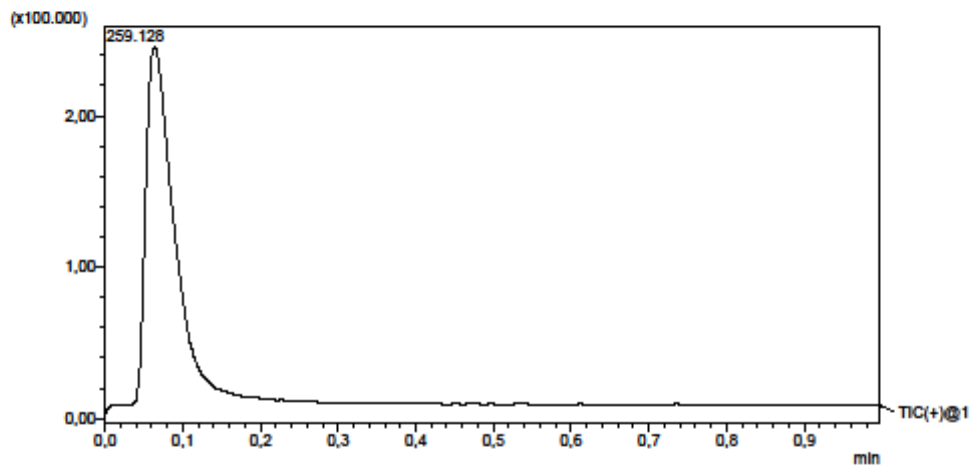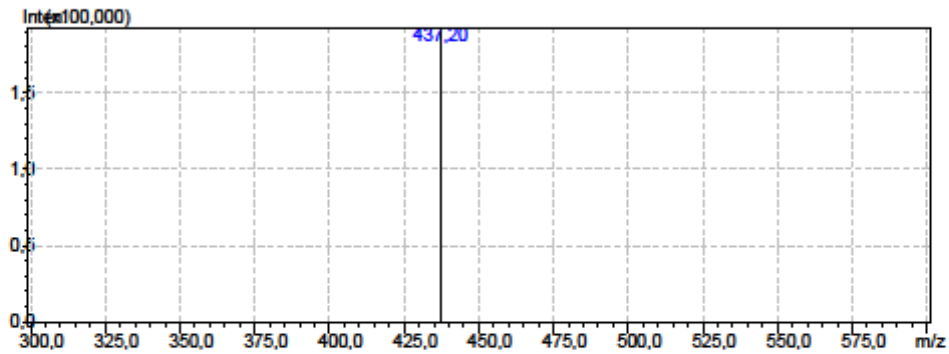

C:\LabSolutions\Data\serkan\Yeni klasör\BI-iso\_001.lcd

**Spectra 12.** LCMSMS spectra of compound **4c**

## DOPNALAB

| Item               | Value                                                      |
|--------------------|------------------------------------------------------------|
| Acquired Date&Time | 13.04.2018 15:53:03                                        |
| Acquired by        | System Administrator                                       |
| Filename           | C:\Users\dopnalab\Desktop\denyal\GAMZE TOKGÖZ\BI-CYL1.lspd |
| Spectrum name      | BI-CYL1                                                    |
| Sample name        | BI-CYL                                                     |
| Sample ID          |                                                            |
| Option             |                                                            |
| Comment            |                                                            |
| No. of Scans       | 10                                                         |
| Resolution         | 4 [cm-1]                                                   |
| Apodization        | Happ-Genzel                                                |

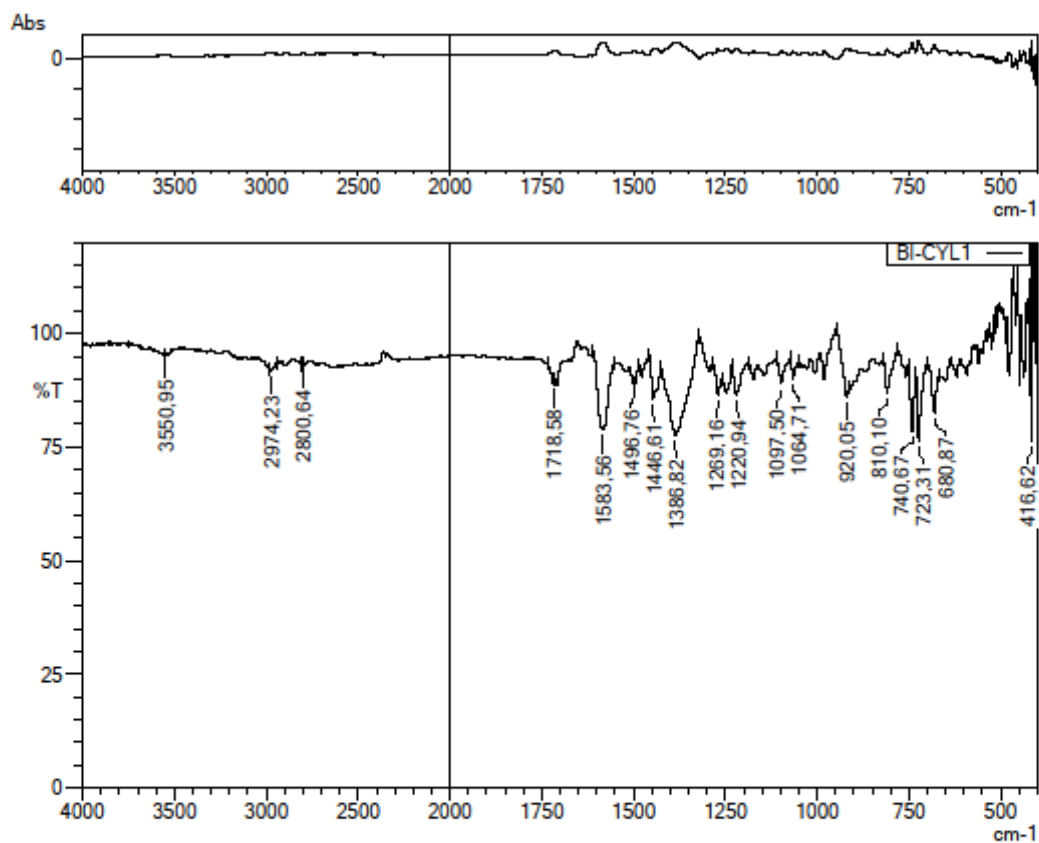

**Spectra 13.** IR spectra of compound **4d**

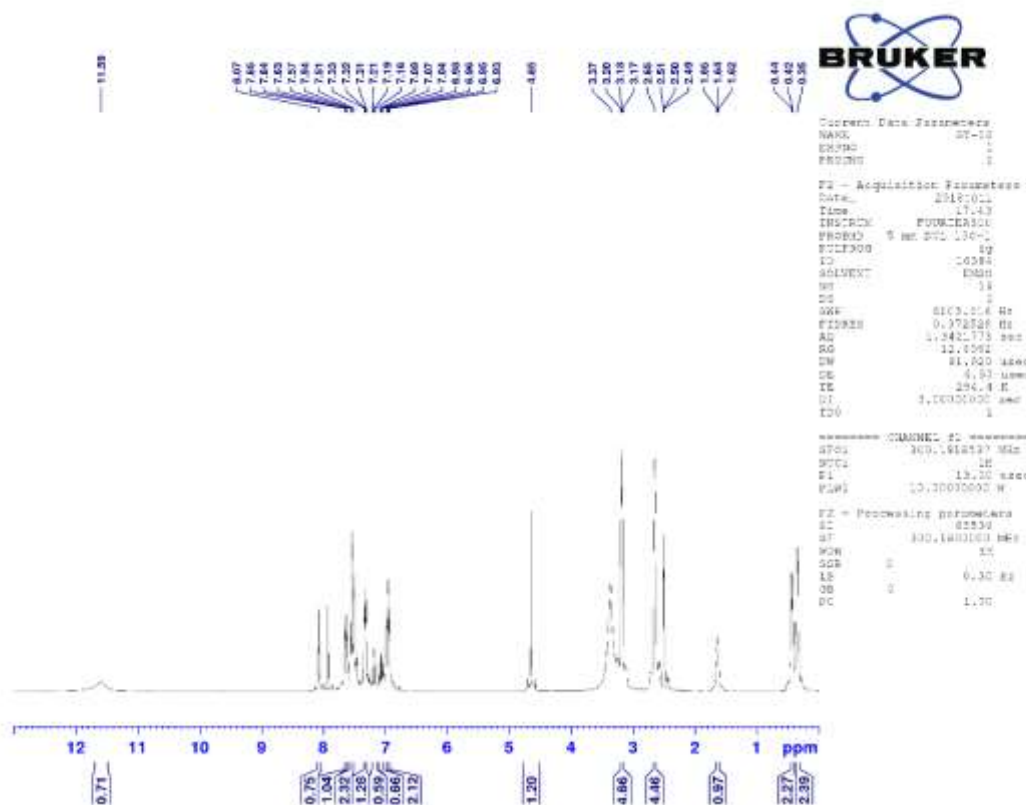

Spectra 14. <sup>1</sup>H-NMR spectra of compound 4d

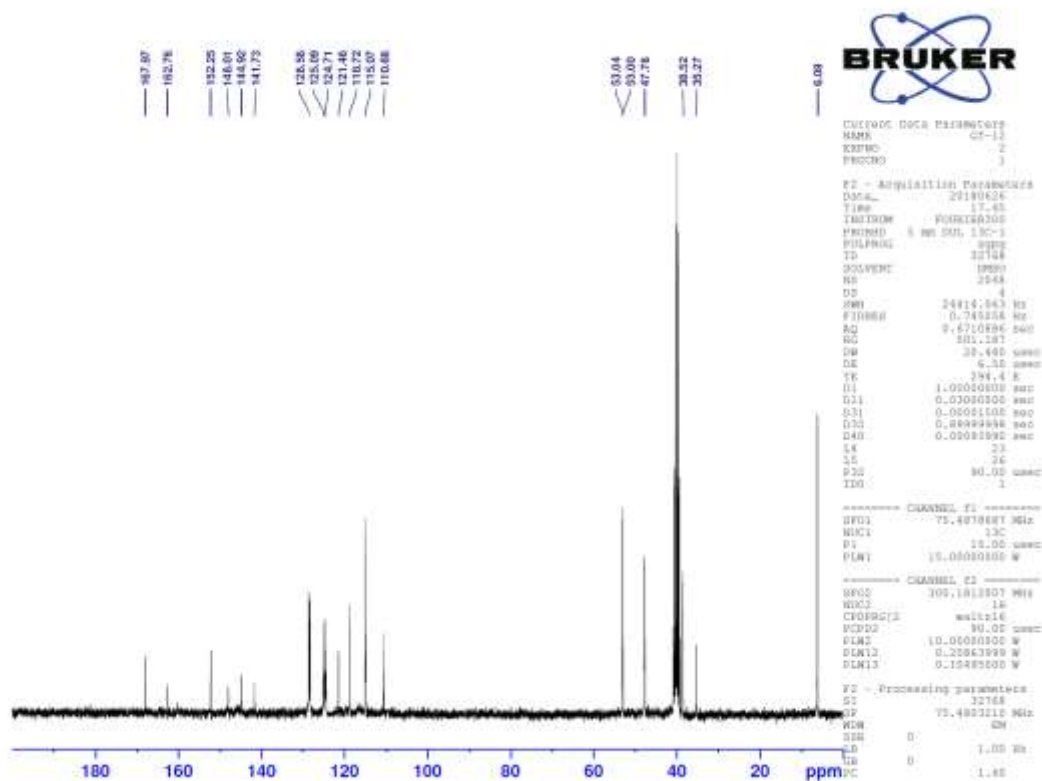

# Spectra 15. <sup>13</sup>C-NMR spectra of compound 4d

29.06.2018 16:58:53 Page 1 / 1

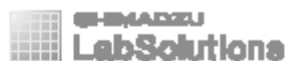

## Analysis Report

### <Sample Information>

|                  |                       |              |                        |
|------------------|-----------------------|--------------|------------------------|
| Sample Name      | : BI-siklo            | Sample Type  | : Unknown              |
| Sample ID        | :                     |              |                        |
| Data Filename    | : BI-siklo_001.lcd    |              |                        |
| Method Filename  | : genel.lcm           |              |                        |
| Batch Filename   | : batch.lcb           |              |                        |
| Vial #           | : 1-7                 |              |                        |
| Injection Volume | : 0,1 uL              | Acquired by  | : System Administrator |
| Date Acquired    | : 29.06.2018 16:34:52 | Processed by | : System Administrator |
| Date Processed   | : 29.06.2018 16:43:33 |              |                        |

### <Chromatogram>

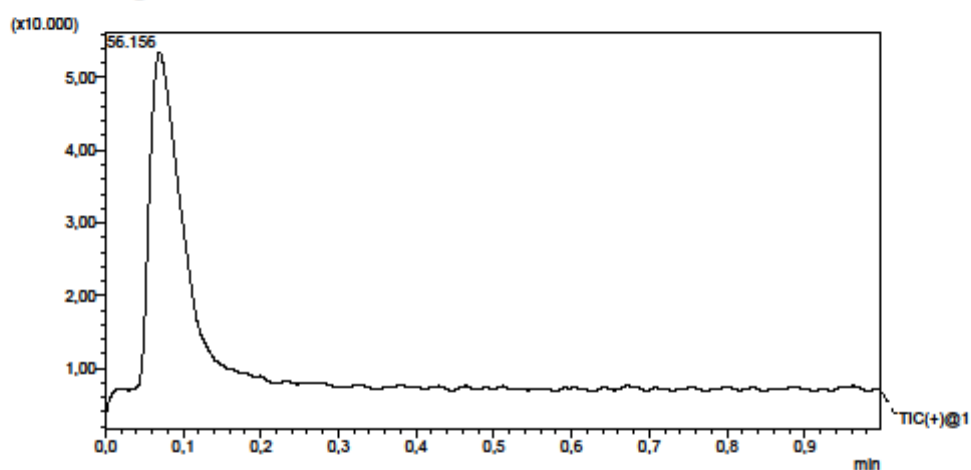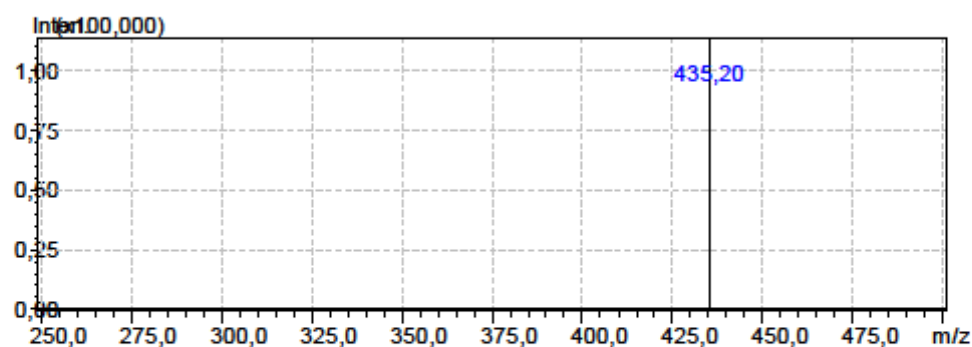

C:\LabSolutions\Data\serkan\Yeni klasör\BI-siklo\_001.lcd

# Spectra 16. LCMSMS spectra of compound 4d

## DOPNALAB

| Item               | Value                                                        |
|--------------------|--------------------------------------------------------------|
| Acquired Date&Time | 13.04.2018 15:26:01                                          |
| Acquired by        | System Administrator                                         |
| Filename           | C:\Users\dopnalab\Desktop\denyal\GAMZE TOKGÖZ\BT-METIL1.lspd |
| Spectrum name      | BT-METIL1                                                    |
| Sample name        | BT-METIL                                                     |
| Sample ID          |                                                              |
| Option             |                                                              |
| Comment            |                                                              |
| No. of Scans       | 10                                                           |
| Resolution         | 4 [cm-1]                                                     |
| Apodization        | Happ-Genzel                                                  |

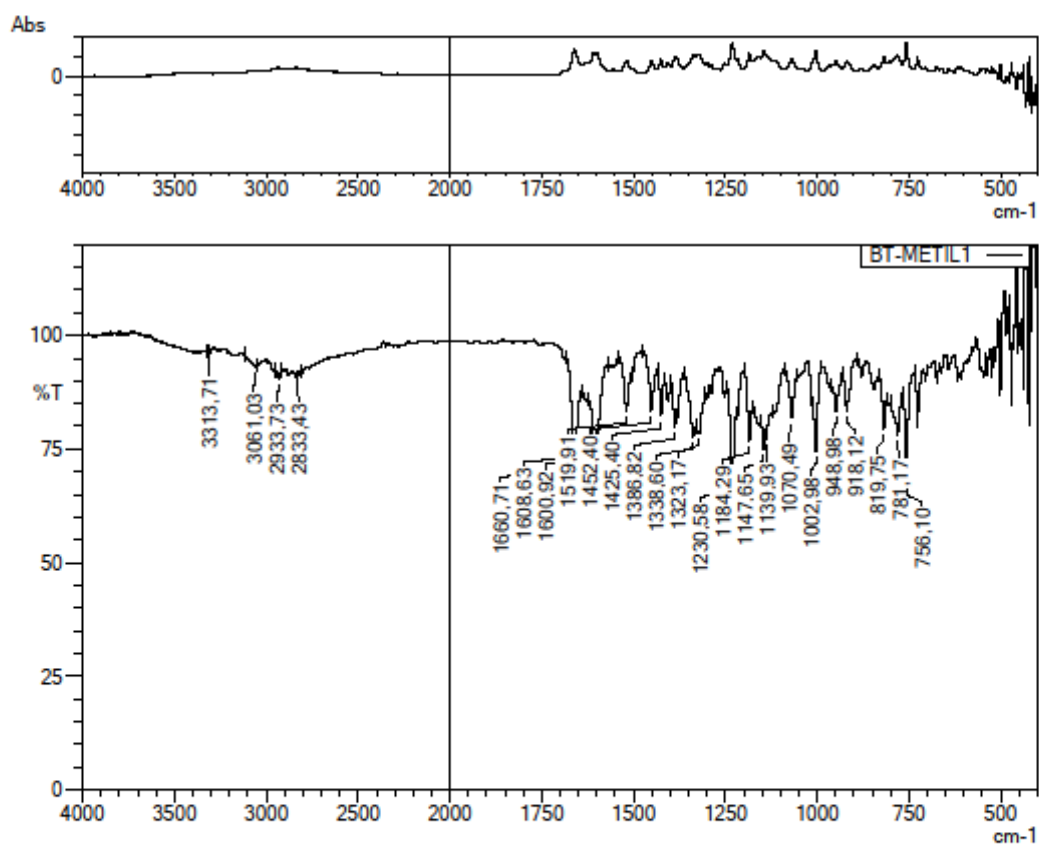

Spectra 17. IR spectra of compound 4e

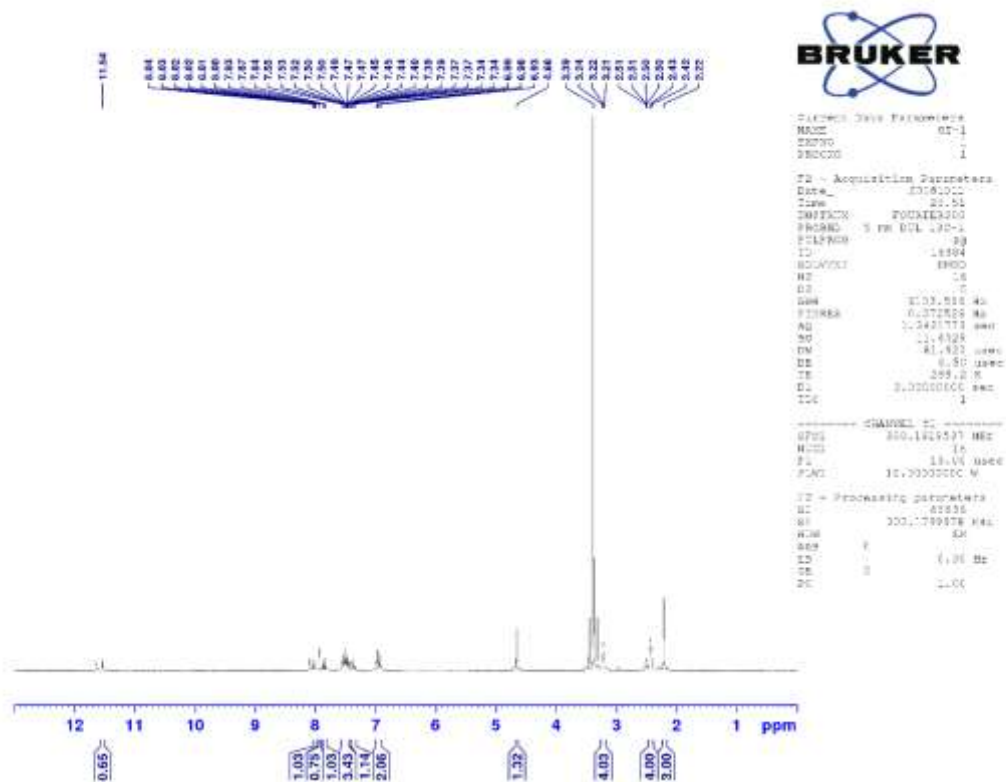

Spectra 18. <sup>1</sup>H-NMR spectra of compound 4e

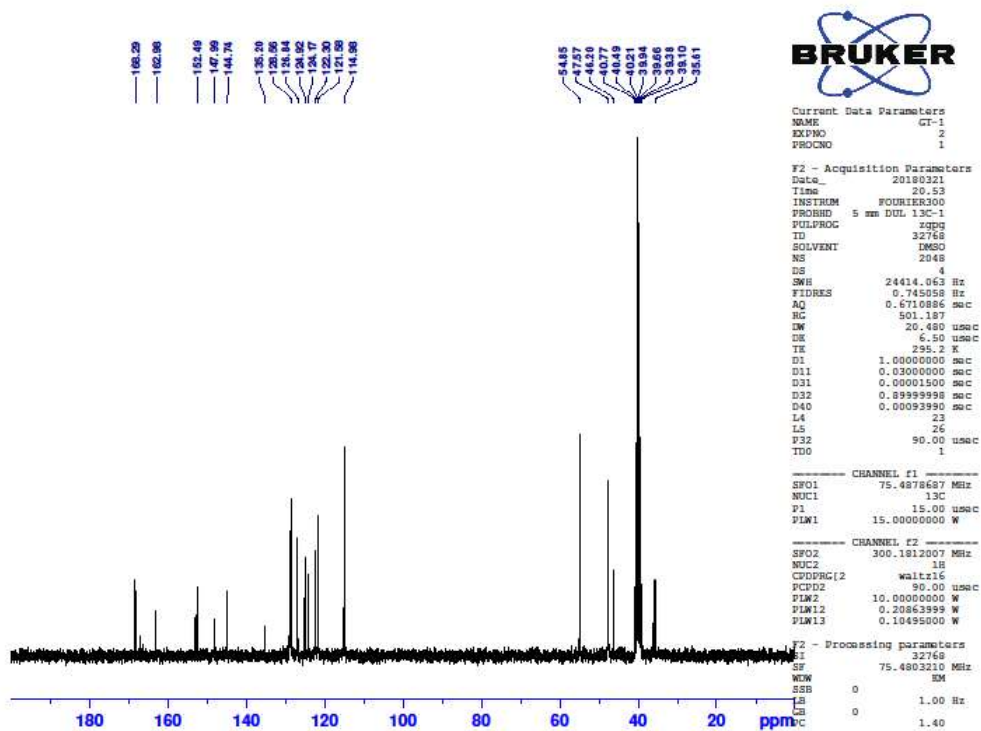

Spectra 19. <sup>13</sup>C-NMR spectra of compound 4e

==== Shimadzu LCMSsolution Analysis Report ====

Acquired by : Admin  
Sample Name : BT-Me  
Sample ID :  
Vial # : 12  
Injection Volume : 0.3 uL  
Data File Name : BT-Me\_26.lcd  
Method File Name : genel.lcm  
Batch File Name : batch.lcb  
Report File Name : DefaultLCMS.lcr  
Data Acquired : 19.04.2018 14:13:30  
Data Processed : 19.04.2018 14:24:32

<Chromatogram>

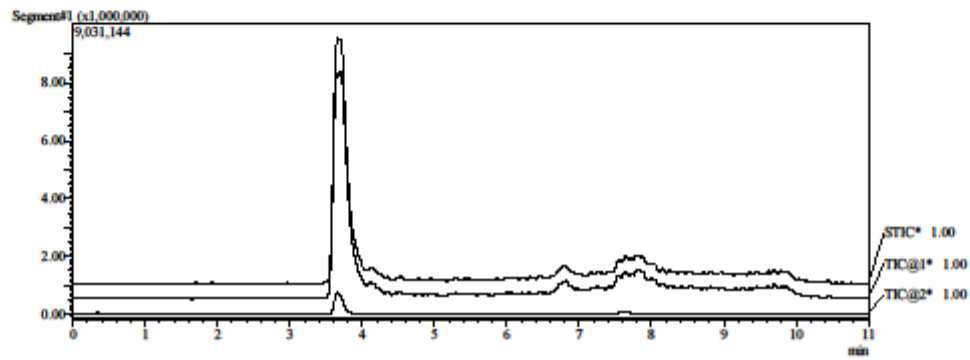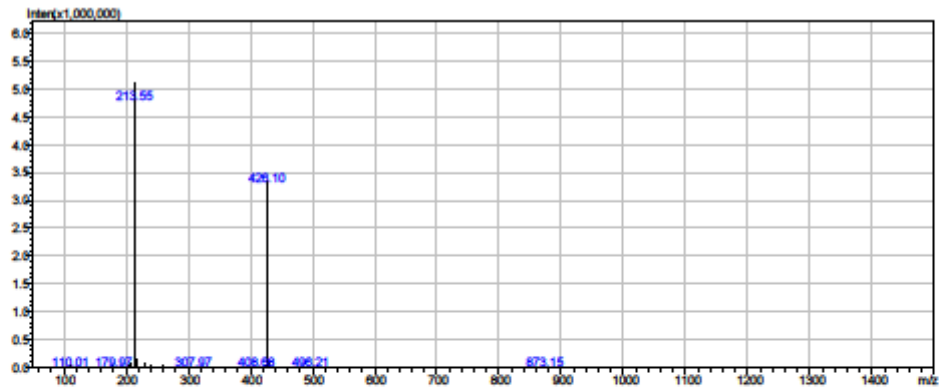

C:\LabSolutions\Data\Analiz\derya\BT-Me\_26.lcd

Spectra 20. LCMSMS spectra of compound 4e

## DOPNALAB

| Item               | Value                                                     |
|--------------------|-----------------------------------------------------------|
| Acquired Date&Time | 13.04.2018 15:28:48                                       |
| Acquired by        | System Administrator                                      |
| Filename           | C:\Users\dopnalab\Desktop\denyal\GAMZE TOKGÖZ\BT-ET1.jspd |
| Spectrum name      | BT-ET1                                                    |
| Sample name        | BT-ET                                                     |
| Sample ID          |                                                           |
| Option             |                                                           |
| Comment            |                                                           |
| No. of Scans       | 10                                                        |
| Resolution         | 4 [cm-1]                                                  |
| Apodization        | Happ-Genzel                                               |

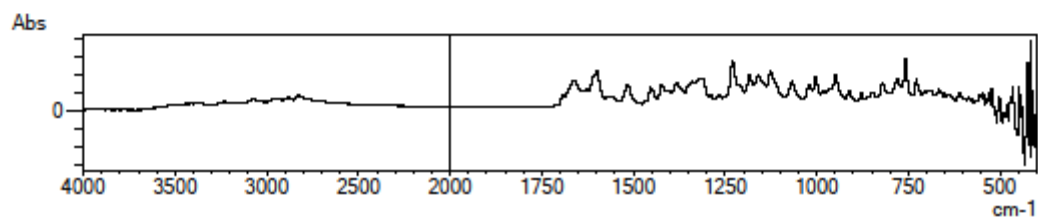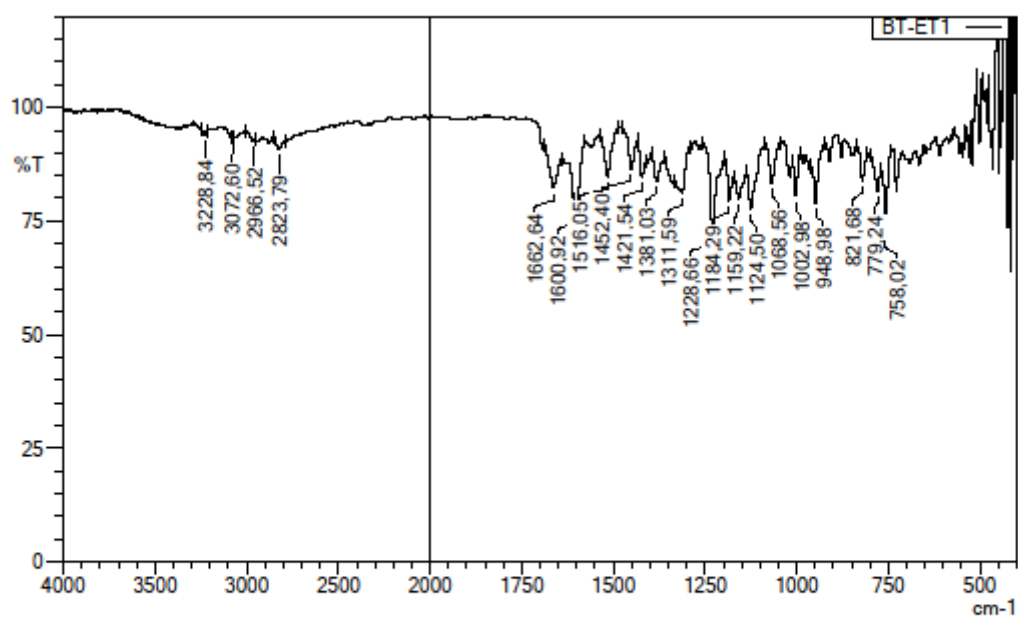

**Spectra 21.** IR spectra of compound **4f**



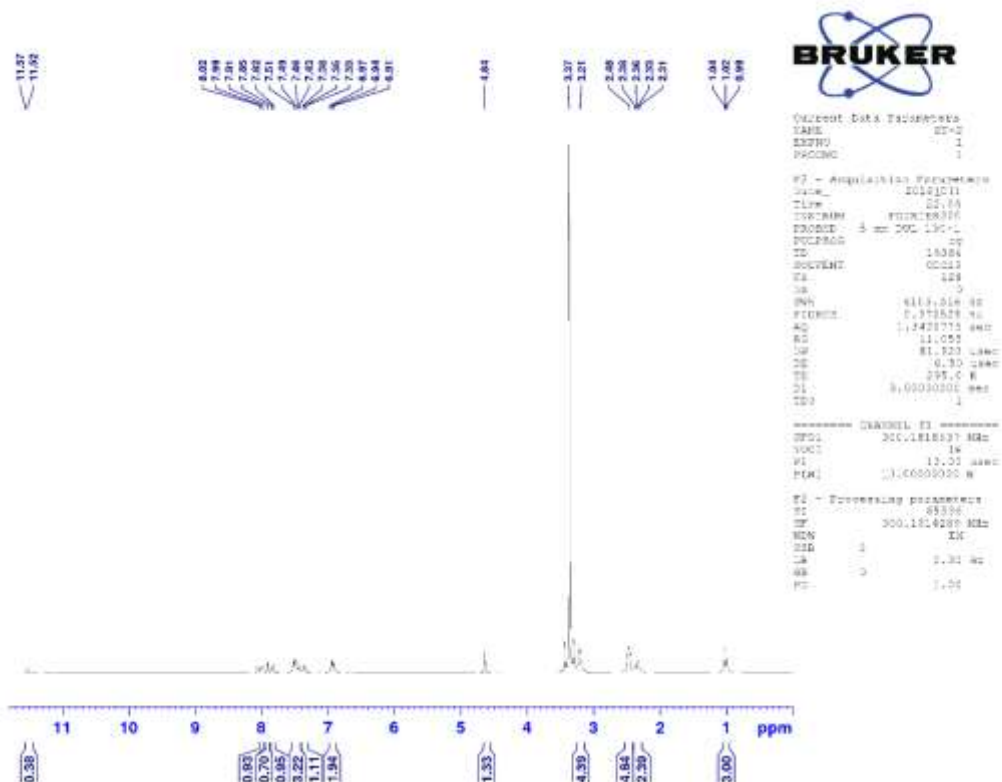

Spectra 22. <sup>1</sup>H-NMR spectra of compound 4f

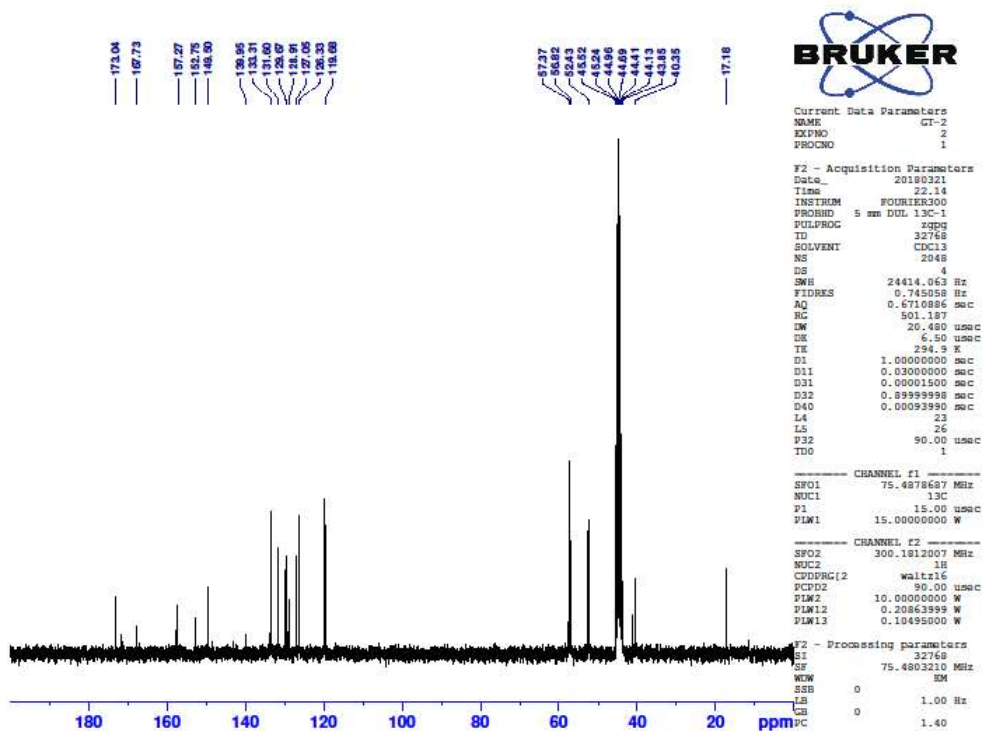

Spectra 23. <sup>13</sup>C-NMR spectra of compound 4f

==== Shimadzu LCMSsolution Analysis Report ====

Acquired by : Admin  
 Sample Name : BT-Et  
 Sample ID :  
 Vial # : 10  
 Injection Volume : 0.3 uL  
 Data File Name : BT-Et\_24.lcd  
 Method File Name : genel.lcm  
 Batch File Name : batch.lcb  
 Report File Name : DefaultLCMS.lcr  
 Data Acquired : 19.04.2018 13:50:23  
 Data Processed : 19.04.2018 14:01:25

<Chromatogram>

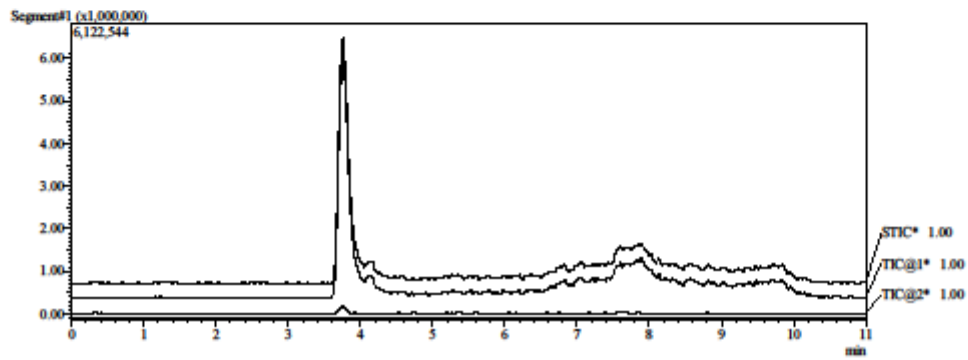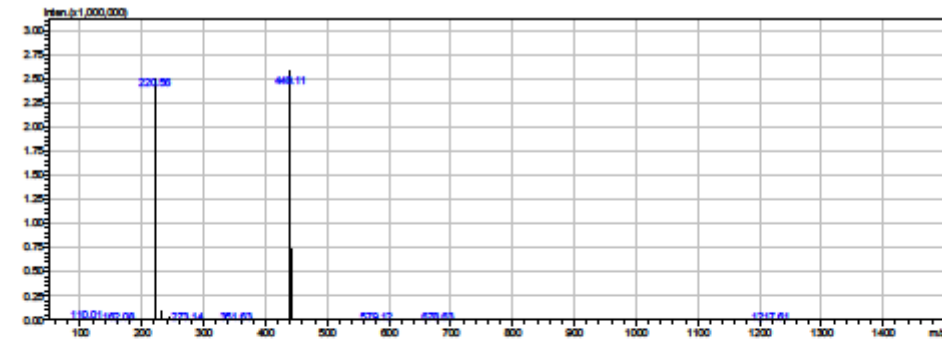

C:\LabSolutions\Data\Analiz\derya\BT-Et\_24.lcd

Spectra 24. LCMSMS spectra of compound 4f

## DOPNALAB

| Item               | Value                                                     |
|--------------------|-----------------------------------------------------------|
| Acquired Date&Time | 13.04.2018 15:32:11                                       |
| Acquired by        | System Administrator                                      |
| Filename           | C:\Users\dopnalab\Desktop\denya\GAMZE TOKGÖZ\BT-ISO1.lspd |
| Spectrum name      | BT-ISO1                                                   |
| Sample name        | BT-ISO                                                    |
| Sample ID          |                                                           |
| Option             |                                                           |
| Comment            |                                                           |
| No. of Scans       | 10                                                        |
| Resolution         | 4 [cm-1]                                                  |
| Apodization        | Happ-Genzel                                               |

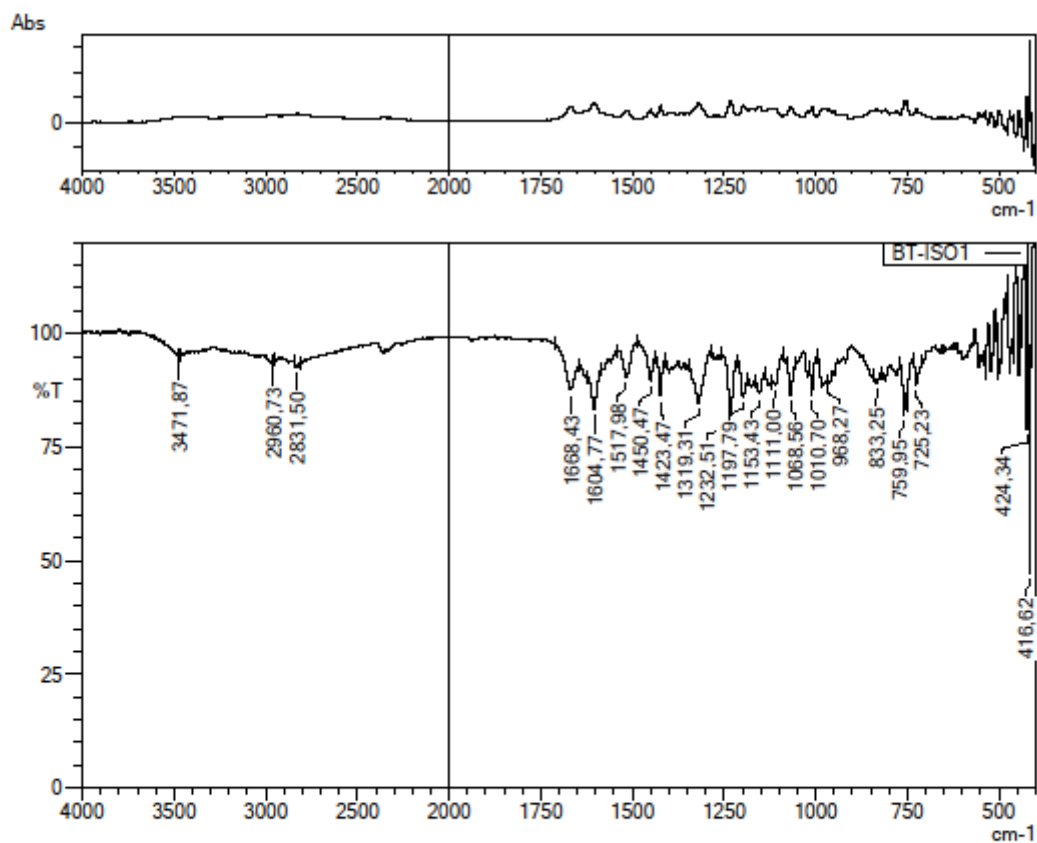

Spectra 25. IR spectra of compound **4g**

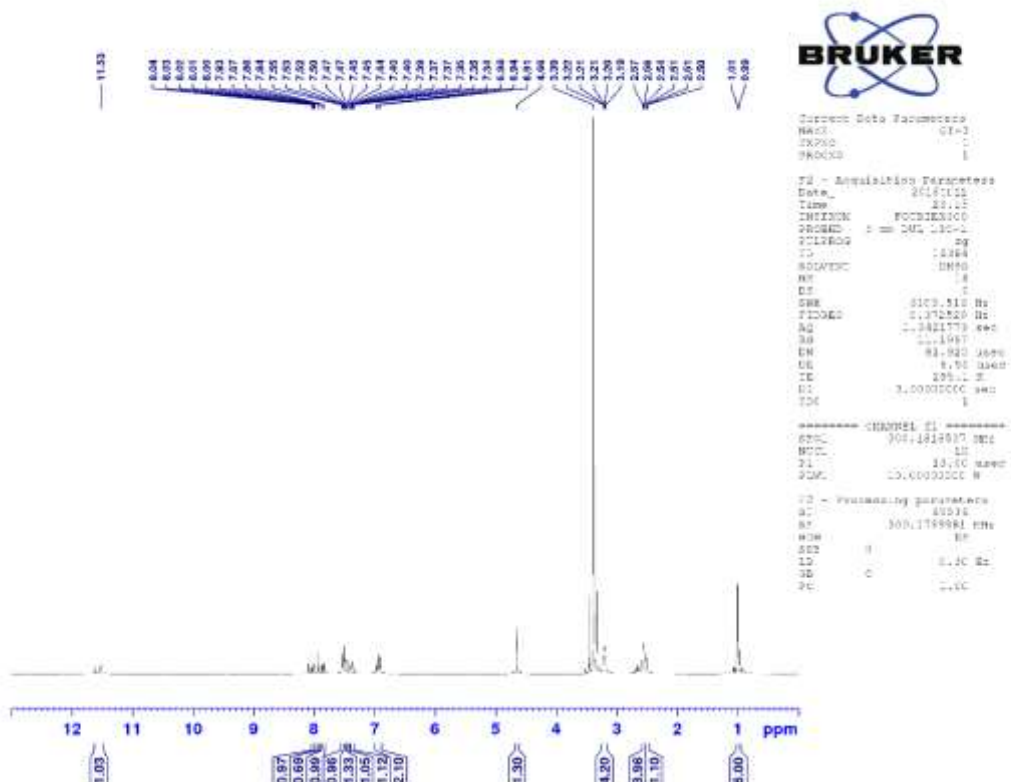

Spectra 26. <sup>1</sup>H-NMR spectra of compound 4g

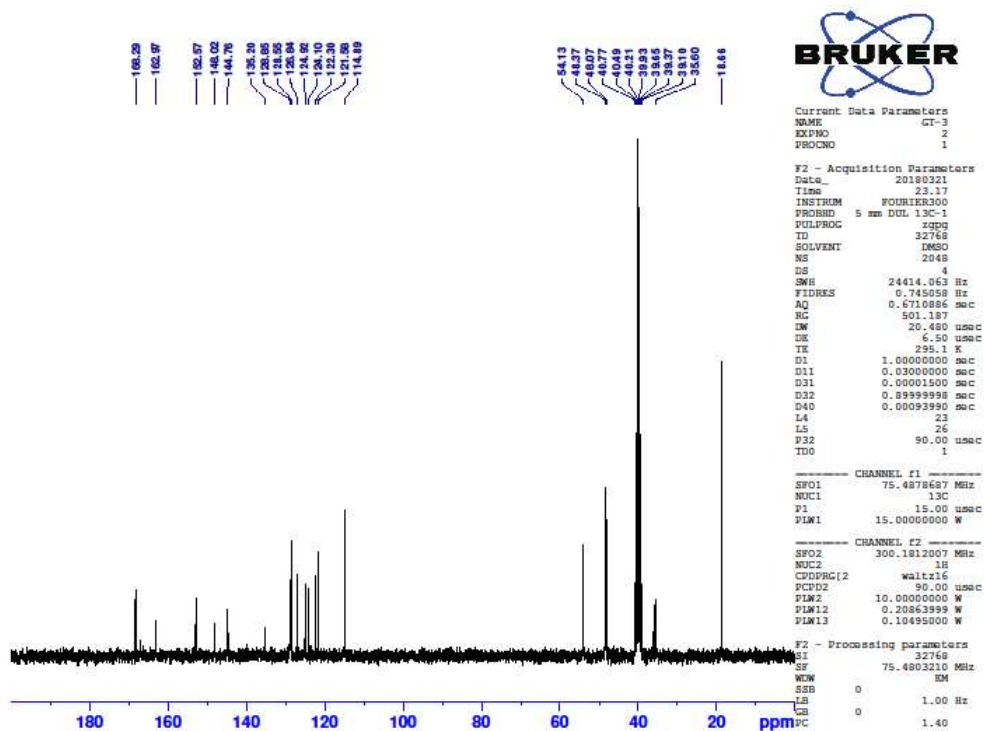

Spectra 27. <sup>13</sup>C-NMR spectra of compound 4g

==== Shimadzu LCMSsolution Analysis Report ====

Acquired by : Admin  
Sample Name : BT-Iso  
Sample ID :  
Vial # : 11  
Injection Volume : 0.3 uL  
Data File Name : BT-Iso\_25.lcd  
Method File Name : genel.lcm  
Batch File Name : batch.lcb  
Report File Name : DefaultLCMS.lcr  
Data Acquired : 19.04.2018 14:01:58  
Data Processed : 19.04.2018 14:12:58

<Chromatogram>

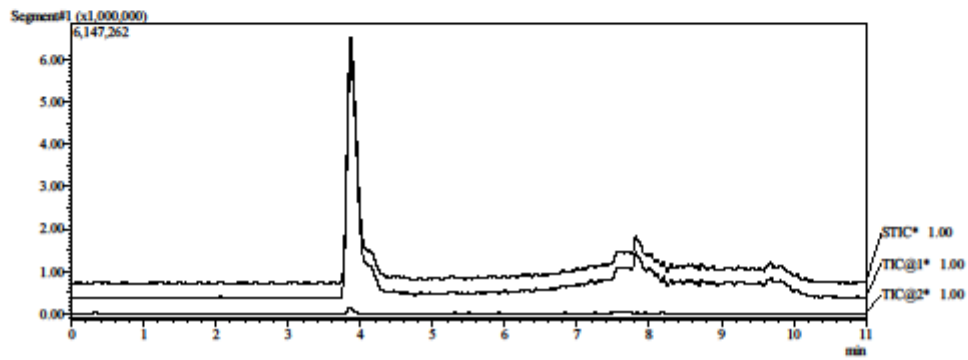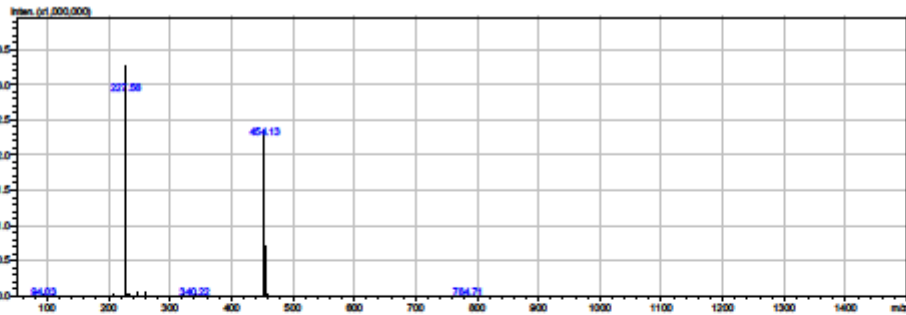

C:\LabSolutions\Data\Analiz\derya\BT-Iso\_25.lcd

Spectra 28. LCMSMS spectra of compound 4g

## DOPNALAB

| Item               | Value                                                      |
|--------------------|------------------------------------------------------------|
| Acquired Date&Time | 13.04.2018 15:34:55                                        |
| Acquired by        | System Administrator                                       |
| Filename           | C:\Users\dopnalab\Desktop\denyal\GAMZE TOKGÖZ\BT-CYL1.lspd |
| Spectrum name      | BT-CYL1                                                    |
| Sample name        | BT-CYL                                                     |
| Sample ID          |                                                            |
| Option             |                                                            |
| Comment            |                                                            |
| No. of Scans       | 10                                                         |
| Resolution         | 4 [cm-1]                                                   |
| Apodization        | Happ-Genzel                                                |

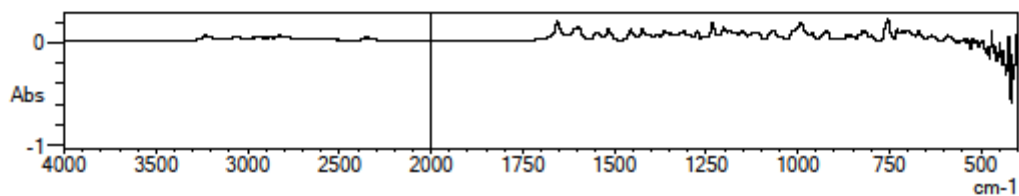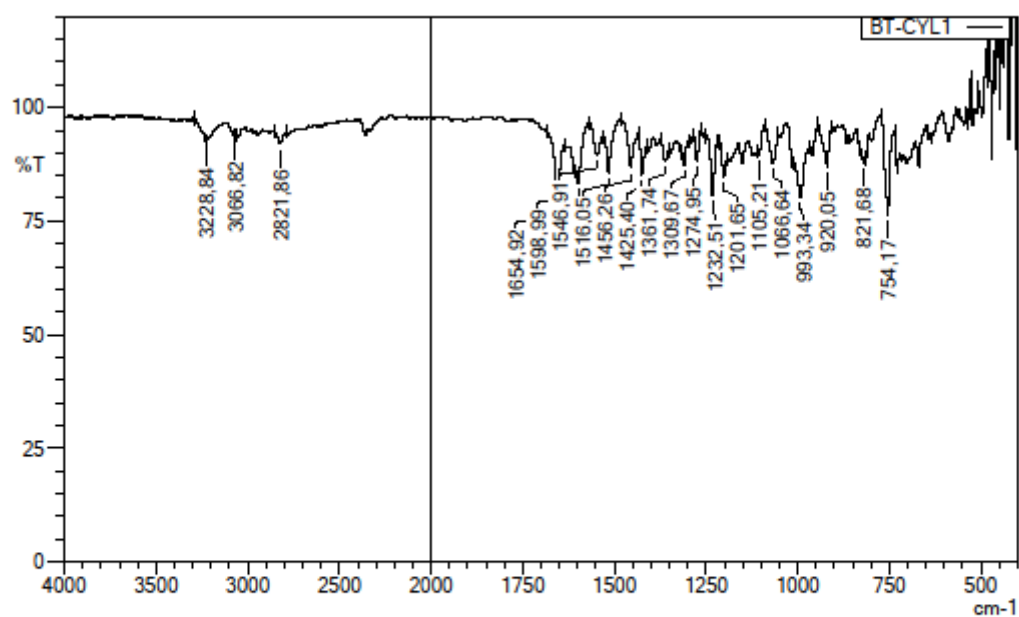

Spectra 29. IR spectra of compound 4h

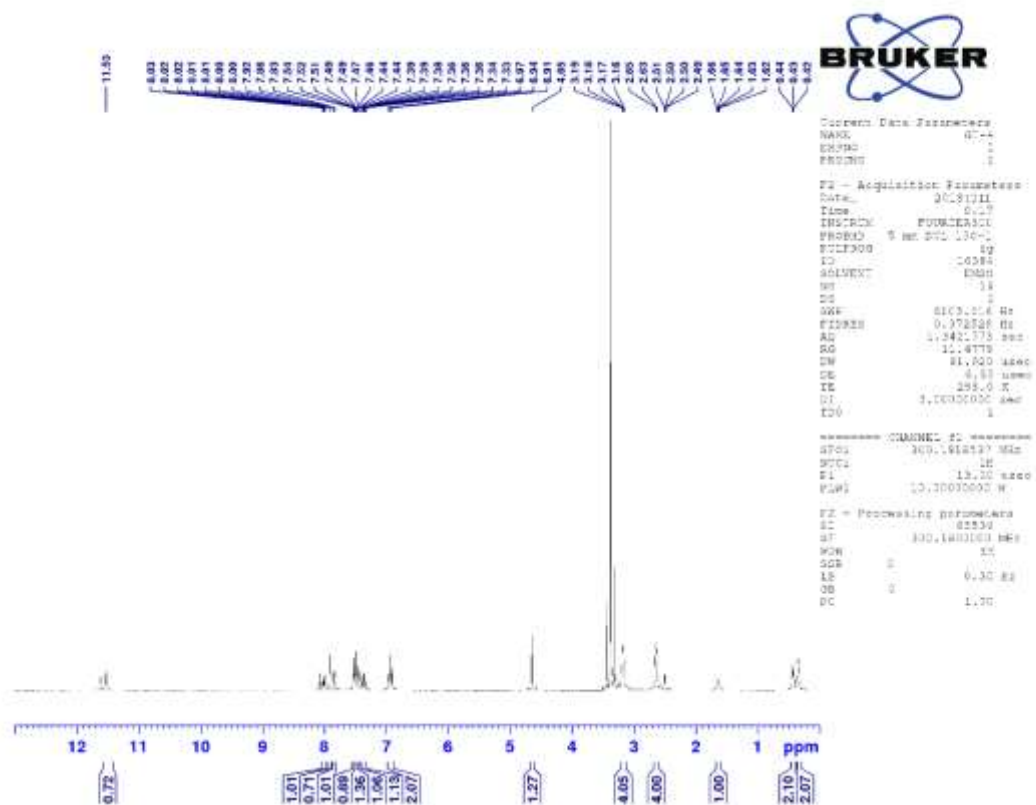

Spectra 30.  $^1\text{H}$ -NMR spectra of compound 4h

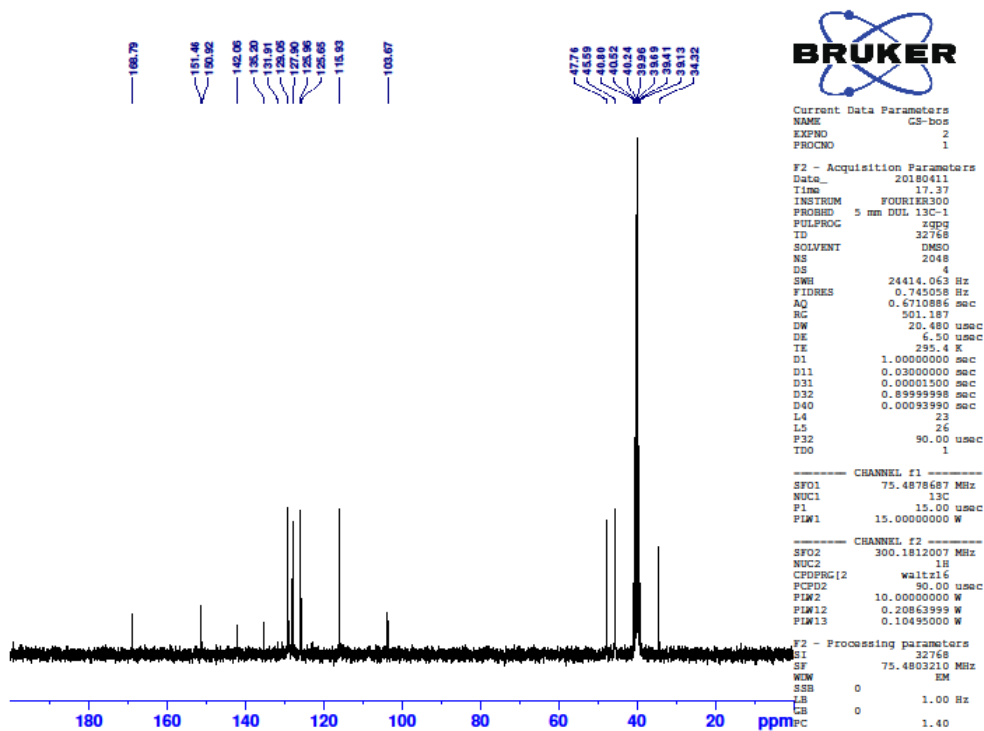

Spectra 31.  $^{13}\text{C}$ -NMR spectra of compound 4h

## Shimadzu LCMSolution Analysis Report

Acquired by : Admin  
Sample Name : ET-99do  
Sample ID :  
Vial # : 9  
Injection Volume : 0.5  $\mu$ L  
Data File Name : ET-99do\_29.Mxd  
Method File Name : genMethod  
Batch File Name : batch1.txt  
Report File Name : Default.LCMS.rpt  
Data Acquired : 18.04.2018 13:38:21  
Data Processed : 18.04.2018 13:48:54

### <<Chromatogram>>

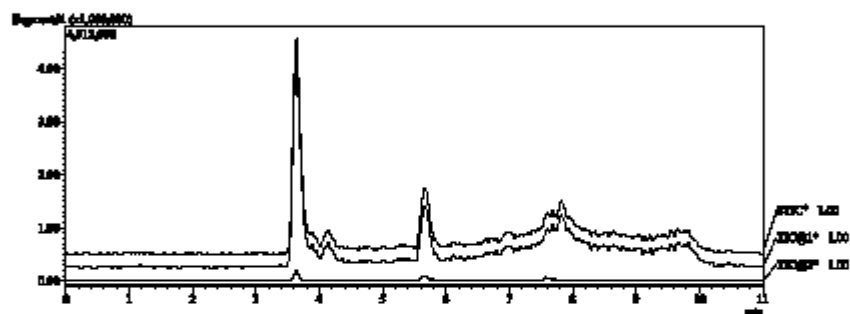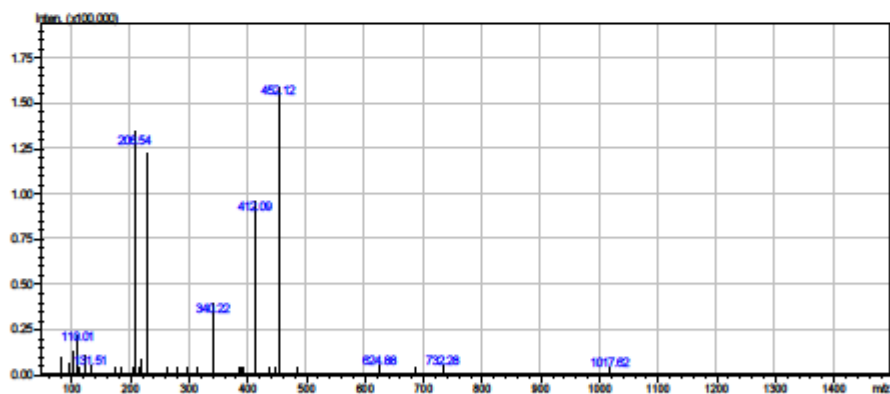

Spectra 32. LCMSMS spectra of compound **4h**
